# Supplementary material
Source: PubMed Central journal article supplement (PMC6069633)
Supplement: NIHMS935631-supplement-3.pdf [file NIHMS935631-supplement-3.pdf]

## Life Sciences Reporting Summary

Nature Research wishes to improve the reproducibility of the work that we publish. This form is intended for publication with all accepted life science papers and provides structure for consistency and transparency in reporting. Every life science submission will use this form; some list items might not apply to an individual manuscript, but all fields must be completed for clarity.

For further information on the points included in this form, see [Reporting Life Sciences Research](#). For further information on Nature Research policies, including our [data availability policy](#), see [Authors & Referees](#) and the [Editorial Policy Checklist](#).

## ▶ Experimental design

## 1. Sample size

Describe how sample size was determined.

Sample size was chosen according to standard practices in the field.

## 2. Data exclusions

Describe any data exclusions.

In accordance with current practice in the field, single cell barcodes with too few reads (<500) were considered technical failures and excluded.

## 3. Replication

Describe whether the experimental findings were reliably reproduced.

All of data were successfully reproduced by each attempt.

## 4. Randomization

Describe how samples/organisms/participants were allocated into experimental groups.

NA

## 5. Blinding

Describe whether the investigators were blinded to group allocation during data collection and/or analysis.

No blinding test in this study.

Note: all studies involving animals and/or human research participants must disclose whether blinding and randomization were used.

## 6. Statistical parameters

For all figures and tables that use statistical methods, confirm that the following items are present in relevant figure legends (or in the Methods section if additional space is needed).

n/a Confirmed

- The exact sample size ( $n$ ) for each experimental group/condition, given as a discrete number and unit of measurement (animals, litters, cultures, etc.)
- A description of how samples were collected, noting whether measurements were taken from distinct samples or whether the same sample was measured repeatedly
- A statement indicating how many times each experiment was replicated
- The statistical test(s) used and whether they are one- or two-sided (note: only common tests should be described solely by name; more complex techniques should be described in the Methods section)
- A description of any assumptions or corrections, such as an adjustment for multiple comparisons
- The test results (e.g.  $P$  values) given as exact values whenever possible and with confidence intervals noted
- A clear description of statistics including central tendency (e.g. median, mean) and variation (e.g. standard deviation, interquartile range)
- Clearly defined error bars

See the web collection on [statistics for biologists](#) for further resources and guidance.

## ► Software

Policy information about [availability of computer code](#)

### 7. Software

Describe the software used to analyze the data in this study.

Flowjo, R

For manuscripts utilizing custom algorithms or software that are central to the paper but not yet described in the published literature, software must be made available to editors and reviewers upon request. We strongly encourage code deposition in a community repository (e.g. GitHub). *Nature Methods* [guidance for providing algorithms and software for publication](#) provides further information on this topic.

## ► Materials and reagents

Policy information about [availability of materials](#)

### 8. Materials availability

Indicate whether there are restrictions on availability of unique materials or if these materials are only available for distribution by a for-profit company.

No unique material was used in this study.

### 9. Antibodies

Describe the antibodies used and how they were validated for use in the system under study (i.e. assay and species).

All antibodies in this study are described in the Method section and their validation data are available on the manufacturer's website.

### 10. Eukaryotic cell lines

a. State the source of each eukaryotic cell line used.

NA

b. Describe the method of cell line authentication used.

NA

c. Report whether the cell lines were tested for mycoplasma contamination.

NA

d. If any of the cell lines used are listed in the database of commonly misidentified cell lines maintained by [ICLAC](#), provide a scientific rationale for their use.

NA

## ► Animals and human research participants

Policy information about [studies involving animals](#); when reporting animal research, follow the [ARRIVE guidelines](#)

### 11. Description of research animals

Provide details on animals and/or animal-derived materials used in the study.

Primary Tconv and Treg cells were isolated from 6-8 week-old male mice using a reporter (Foxp3-IRES-GFP/B6, Foxp3-IRES-Thy1.1/B6 X Nur77-GFP/B6)

Policy information about [studies involving human research participants](#)

### 12. Description of human research participants

Describe the covariate-relevant population characteristics of the human research participants.

2 healthy male and female donors

## Flow Cytometry Reporting Summary

Form fields will expand as needed. Please do not leave fields blank.

### ► Data presentation

For all flow cytometry data, confirm that:

- 1. The axis labels state the marker and fluorochrome used (e.g. CD4-FITC).
- 2. The axis scales are clearly visible. Include numbers along axes only for bottom left plot of group (a 'group' is an analysis of identical markers).
- 3. All plots are contour plots with outliers or pseudocolor plots.
- 4. A numerical value for number of cells or percentage (with statistics) is provided.

### ► Methodological details

5. Describe the sample preparation.

Mice: Tregs were identified as CD4+ Foxp3/GFP+ or Foxp3/Thy1.1+ in the spleen, and CD4+ TCRb+ CD25high in the colon.  
 Humans: Tregs and Tconvs were isolated from the blood as CD4+ CD25+ CD127low and CD4+ CD25- CD127high, respectively.

6. Identify the instrument used for data collection.

LSRII

7. Describe the software used to collect and analyze the flow cytometry data.

Flowjo

8. Describe the abundance of the relevant cell populations within post-sort fractions.

Around 96% by single sorting, 99% by double sorting

9. Describe the gating strategy used.

Mice: Starting cells were gated by FSC/SSC gates and then DAPI to select healthy, live and singlet population. CD4+ cells were further gated as CD4+ and TCRb+. Tregs were further gated as Foxp3GFP+ or Foxp3/Thy1.1+, and Tconv as Foxp3/GFP- or Foxp3/Thy1.1-, or CD25+ (colon)  
 Human: Starting cells were gated by FSC/SSC gates and then DAPI to select healthy, live and singlet population. CD4+ cells were further gated in order to sort Tregs and Tconvs as CD4+ CD25+ CD127low and CD4+ CD25- CD127high, respectively.

Tick this box to confirm that a figure exemplifying the gating strategy is provided in the Supplementary Information.
